# Supplementary material
Source: PubMed Central journal article supplement (PMC6461722)
Supplement: nxy316_supplement_tables.pdf [file nxy316_supplement_tables.pdf]

## Supplementary data

**Supplemental Table 1** Baseline circulating concentrations of sex steroid hormones by *COMT* genotype activity regardless of treatment group in postmenopausal women (*n*= 937)

| <b>Sex hormone</b>                      | <b><i>G/G COMT</i><br/>Genotype (<i>n</i> = 248)</b> | <b><i>A/A COMT</i><br/>Genotype (<i>n</i>= 300)</b> | <b><i>G/A COMT</i><br/>Genotype (<i>n</i>= 389)</b> | <b><i>P</i><sup>1</sup></b> |
|-----------------------------------------|------------------------------------------------------|-----------------------------------------------------|-----------------------------------------------------|-----------------------------|
| <b>Estrone, pg/mL</b>                   | 23.8 (22.2, 25.5)                                    | 22.2 (20.9, 23.7)                                   | 23.6 (22.3, 25.0)                                   | 0.29                        |
| <b>Estradiol, pg/mL</b>                 | 3.3 (2.8, 3.7)                                       | 3.6 (3.2, 4.1)                                      | 3.7 (3.3, 4.1)                                      | 0.41                        |
| <b>Bioavailable estradiol, pg/mL</b>    | 1.5 (1.3, 1.7)                                       | 1.6 (1.4, 1.8)                                      | 1.7 (1.5, 1.9)                                      | 0.42                        |
| <b>Androstenedione, pg/mL</b>           | 485 (458, 513)                                       | 492 (467, 518)                                      | 501 (478, 524)                                      | 0.70                        |
| <b>Testosterone, pg/mL</b>              | 165 (153, 178)                                       | 151 (141, 162)                                      | 155 (146, 165)                                      | 0.24                        |
| <b>Bioavailable testosterone, pg/mL</b> | 42.1 (38.7, 45.9)                                    | 38.0 (35.2, 41.1)                                   | 40.4 (37.8, 43.2)                                   | 0.22                        |
| <b>SHBG, nmol/L</b>                     | 69.8 (65.5, 74.4)                                    | 70.1 (66.1, 74.3)                                   | 66.7 (63.3, 70.2)                                   | 0.35                        |

Values are geometric means (95% CIs). Abbreviations: *COMT*, catechol-O-methyltransferase; SHBG, sex hormone binding globulin.

<sup>1</sup> *P* value for difference across *G/G* vs *A/A* vs *G/A COMT* genotype groups based on one-way ANOVA test.

## Supplementary data

**Supplemental Table 2** Baseline circulating concentrations of sex steroid hormones and IGF-1 and IGFBP-3 by age (years) regardless of treatment group in postmenopausal women (*n*= 937)

| <b>Sex hormone and IGF protein</b>      | <b>50- 54 (<i>n</i>= 127)</b> | <b>55- 59 (<i>n</i>= 312)</b> | <b>60- 64 (<i>n</i>= 277)</b> | <b>65- 70 (<i>n</i>= 221)</b> | <b><i>P</i><sup>1</sup></b> |
|-----------------------------------------|-------------------------------|-------------------------------|-------------------------------|-------------------------------|-----------------------------|
| <b>Estrone, pg/mL</b>                   | 26.0 (23.6, 28.6)             | 22.9 (21.5, 24.3)             | 22.8 (21.4, 24.4)             | 22.7 (21.1, 24.4)             | 0.08                        |
| <b>Estradiol, pg/mL</b>                 | 5.6 (4.6, 6.8)                | 3.3 (2.9, 3.8)                | 3.3 (2.9, 3.7)                | 3.2 (2.8, 3.7)                | 0.0005                      |
| <b>Bioavailable estradiol, pg/mL</b>    | 2.5 (2.0, 3.1)                | 1.5 (1.3, 1.7)                | 1.5 (1.3, 1.7)                | 1.4 (1.2, 1.7)                | 0.0005                      |
| <b>Androstenedione, pg/mL</b>           | 520 (479, 565)                | 518 (491, 546)                | 485 (459, 513)                | 457 (429, 487)                | 0.002                       |
| <b>Testosterone, pg/mL</b>              | 144 (129, 160)                | 154 (144, 165)                | 153 (143, 165)                | 171 (158, 186)                | 0.01                        |
| <b>Bioavailable testosterone, pg/mL</b> | 36.7 (32.6, 41.3)             | 39.9 (37.0, 43.0)             | 39.7 (36.7, 43.0)             | 42.9 (39.2, 46.9)             | 0.06                        |
| <b>SHBG, nmol/L</b>                     | 69.7 (64.3, 75.6)             | 67.8 (64.4, 71.4)             | 67.1 (63.5, 70.9)             | 70.9 (66.7, 75.4)             | 0.64                        |
| <b>IGF-1, ng/mL</b>                     | 96.5 (92.0, 101.2)            | 90.9 (88.2, 93.7)             | 85.6 (82.9, 88.4)             | 82.0 (79.1, 85.1)             | <0.0001                     |
| <b>IGFBP-3, ng/mL</b>                   | 2064 (1990, 2141)             | 2087 (2039, 2136)             | 2021 (1971, 2072)             | 2018 (1963, 2075)             | 0.08                        |

Values are geometric means (95% CIs). Abbreviations: IGF-1, insulin-like growth factor; IGFBP-3, insulin-like growth factor binding protein 3; SHBG, sex hormone binding globulin.

<sup>1</sup> *P* values derived from ANOVA test across four age groups with adjustment for BMI at baseline.

## Supplementary data

| <b>Supplemental Table 3</b> Circulating levels of sex hormones by age (years) in postmenopausal women randomly assigned to GTE or placebo group ( $n = 937$ ) |                                      |                   |                                      |                   |                                      |                   |                                      |                   |                         |
|---------------------------------------------------------------------------------------------------------------------------------------------------------------|--------------------------------------|-------------------|--------------------------------------|-------------------|--------------------------------------|-------------------|--------------------------------------|-------------------|-------------------------|
| <b>Sex hormone</b>                                                                                                                                            | <b>50- 54 (<math>n = 127</math>)</b> |                   | <b>55- 59 (<math>n = 312</math>)</b> |                   | <b>60- 64 (<math>n = 277</math>)</b> |                   | <b>65- 70 (<math>n = 221</math>)</b> |                   | <b><math>P^1</math></b> |
| <b>Time point</b>                                                                                                                                             | GTE ( $n = 56$ )                     | PLC ( $n = 71$ )  | GTE ( $n = 151$ )                    | PLC ( $n = 161$ ) | GTE ( $n = 145$ )                    | PLC ( $n = 132$ ) | GTE ( $n = 111$ )                    | PLC ( $n = 110$ ) |                         |
| <b>Estrone, pg/mL</b>                                                                                                                                         |                                      |                   |                                      |                   |                                      |                   |                                      |                   |                         |
| Month 0                                                                                                                                                       | 23.5 (20.3, 27.1)                    | 28.2 (24.8, 32.0) | 21.5 (19.7, 23.5)                    | 24.2 (22.2, 26.4) | 22.2 (20.3, 24.3)                    | 23.5 (21.4, 25.8) | 24.9 (22.4, 27.6)                    | 20.7 (18.7, 22.9) | 0.009                   |
| Month 12                                                                                                                                                      | 26.2 (22.7, 30.3)                    | 24.0 (21.1, 27.3) | 21.1 (19.3, 23.1)                    | 21.0 (19.3, 22.9) | 21.7 (19.8, 23.7)                    | 23.9 (21.7, 26.2) | 23.5 (21.2, 26.0)                    | 22.2 (20.0, 24.6) |                         |
| <b>Estradiol, pg/mL</b>                                                                                                                                       |                                      |                   |                                      |                   |                                      |                   |                                      |                   |                         |
| Month 0                                                                                                                                                       | 5.0 (3.7, 6.6)                       | 6.1 (4.7, 7.9)    | 2.9 (2.4, 3.5)                       | 3.8 (3.2, 4.5)    | 3.2 (2.7, 3.8)                       | 3.4 (2.8, 4.1)    | 3.6 (2.9, 4.4)                       | 2.9 (2.4, 3.6)    | 0.13                    |
| Month 12                                                                                                                                                      | 5.6 (4.2, 7.4)                       | 3.6 (2.8, 4.6)    | 3.2 (2.7, 3.8)                       | 3.1 (2.6, 3.7)    | 3.7 (3.1, 4.4)                       | 3.0 (2.5, 3.6)    | 3.7 (3.0, 4.5)                       | 3.1 (2.5, 3.8)    |                         |
| <b>Bioavailable estradiol, pg/mL</b>                                                                                                                          |                                      |                   |                                      |                   |                                      |                   |                                      |                   |                         |
| Month 0                                                                                                                                                       | 2.1 (1.6, 2.9)                       | 2.8 (2.2, 3.7)    | 1.3 (1.1, 1.6)                       | 1.7 (1.4, 2.1)    | 1.4 (1.2, 1.7)                       | 1.5 (1.3, 1.9)    | 1.6 (1.3, 2.0)                       | 1.3 (1.0, 1.6)    | 0.13                    |
| Month 12                                                                                                                                                      | 2.5 (1.9, 3.3)                       | 1.7 (1.3, 2.2)    | 1.5 (1.2, 1.8)                       | 1.4 (1.2, 1.7)    | 1.7 (1.4, 2.0)                       | 1.4 (1.1, 1.7)    | 1.6 (1.3, 2.0)                       | 1.4 (1.1, 1.7)    |                         |
| <b>Androstenedione, pg/mL</b>                                                                                                                                 |                                      |                   |                                      |                   |                                      |                   |                                      |                   |                         |
| Month 0                                                                                                                                                       | 525 (464, 595)                       | 516 (462, 577)    | 504 (467, 543)                       | 532 (494, 573)    | 459 (425, 496)                       | 515 (475, 559)    | 454 (415, 496)                       | 460 (421, 503)    | 0.50                    |
| Month 12                                                                                                                                                      | 547 (487, 613)                       | 512 (463, 568)    | 485 (452, 520)                       | 503 (470, 538)    | 453 (422, 487)                       | 502 (465, 541)    | 433 (399, 470)                       | 407 (374, 441)    |                         |
| <b>Testosterone, pg/mL</b>                                                                                                                                    |                                      |                   |                                      |                   |                                      |                   |                                      |                   |                         |
| Month 0                                                                                                                                                       | 156 (133, 184)                       | 135 (117, 156)    | 144 (131, 159)                       | 163 (149, 180)    | 148 (134, 164)                       | 160 (144, 178)    | 162 (144, 182)                       | 181 (161, 203)    | 0.79                    |
| Month 12                                                                                                                                                      | 165 (142, 193)                       | 138 (120, 158)    | 149 (136, 164)                       | 155 (142, 170)    | 159 (144, 175)                       | 152 (137, 168)    | 167 (149, 186)                       | 172 (154, 192)    |                         |
| <b>Bioavailable testosterone, pg/mL</b>                                                                                                                       |                                      |                   |                                      |                   |                                      |                   |                                      |                   |                         |
| Month 0                                                                                                                                                       | 38.0 (31.8, 45.4)                    | 35.7 (30.5, 41.8) | 37.2 (33.4, 41.5)                    | 42.6 (38.3, 47.3) | 37.9 (34.0, 42.4)                    | 41.8 (37.2, 46.9) | 41.1 (36.2, 46.7)                    | 44.8 (39.4, 50.8) | 0.81                    |
| Month 12                                                                                                                                                      | 41.9 (35.4, 49.7)                    | 37.2 (32.0, 43.3) | 39.2 (35.3, 43.5)                    | 40.9 (37.0, 45.2) | 40.9 (36.8, 45.5)                    | 39.6 (35.4, 44.2) | 41.9 (37.1, 47.3)                    | 42.4 (37.6, 47.9) |                         |
| <b>SHBG, nmol/L</b>                                                                                                                                           |                                      |                   |                                      |                   |                                      |                   |                                      |                   |                         |
| Month 0                                                                                                                                                       | 74.4 (65.8, 84.0)                    | 66.3 (59.5, 73.9) | 67.1 (62.3, 72.3)                    | 68.4 (63.7, 73.6) | 66.8 (61.9, 72.1)                    | 67.4 (62.3, 73.0) | 69.2 (63.4, 75.5)                    | 72.6 (66.6, 79.3) | 0.90                    |
| Month 12                                                                                                                                                      | 69.8 (61.5, 79.3)                    | 64.8 (57.9, 72.5) | 67.3 (62.3, 72.7)                    | 67.7 (62.8, 72.9) | 68.7 (63.5, 74.4)                    | 67.6 (62.2, 73.4) | 71.2 (65.1, 78.0)                    | 72.7 (66.4, 79.6) |                         |

Values are geometric means (95% CIs). Abbreviations: GTE, green tea extract; PLC, placebo; SHBG, sex hormone binding globulin.

<sup>1</sup>  $P$  values for the interaction between treatment and age based on relative changes of hormones from baseline derived from generalized linear model with adjustment for BMI and hormone levels at baseline.
